# Supplementary material
Source: PubMed Central journal article supplement (PMC3436131)
Supplement: supp_M112.391243_jbc.M112.391243-1.pdf [file supp_M112.391243_jbc.M112.391243-1.pdf]

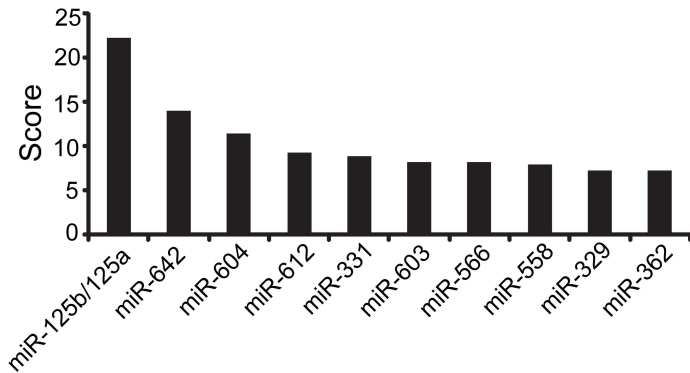

**Supplementary Figure S1.** The microarray data were analyzed by algorithm 'DIANA-mirExTra'. The score indicates the frequency of seed sequences of indicated miRNAs found in the 3'UTR of genes down-regulated by miR-125b in microarray analysis. Only the top ten miRNAs are shown.

Supplementary table S1. MicroRNAs deregulated in cSCC compared to healthy skin.

| Up-regulated genes   |           |             |             |
|----------------------|-----------|-------------|-------------|
| Gene names           | Score (d) | Fold change | q-value (%) |
| hsa-miR-31           | 4,21      | 135,17      | 0,00        |
| hsa-miR-21           | 3,70      | 3,80        | 0,00        |
| hsa-miR-135b         | 3,14      | 32,25       | 0,00        |
| hsa-miR-223          | 2,65      | 4,64        | 2,44        |
|                      |           |             |             |
| Down-regulated genes |           |             |             |
| Gene names           | Score (d) | Fold change | q-value (%) |
| hsa-let-7c           | -7,86     | 0,11        | 0,00        |
| hsa-miR-328          | -6,55     | 0,08        | 0,00        |
| hsa-miR-195          | -5,98     | 0,14        | 0,00        |
| hsa-miR-30a-3p       | -5,15     | 0,11        | 0,00        |
| hsa-miR-29c          | -5,13     | 0,21        | 0,00        |
| hsa-miR-143          | -4,88     | 0,11        | 0,00        |
| hsa-miR-125b         | -4,69     | 0,15        | 0,00        |
| hsa-miR-375          | -4,68     | 0,07        | 0,00        |
| hsa-miR-497          | -4,62     | 0,15        | 0,00        |
| hsa-let-7g           | -4,49     | 0,27        | 0,00        |
| hsa-miR-199b         | -4,39     | 0,13        | 0,00        |
| hsa-miR-26a          | -4,23     | 0,23        | 0,00        |
| hsa-miR-199a         | -4,20     | 0,24        | 0,00        |
| hsa-miR-30e-5p       | -4,06     | 0,21        | 0,00        |
| hsa-miR-10a          | -3,96     | 0,14        | 0,00        |
| hsa-miR-99a          | -3,78     | 0,14        | 0,00        |
| hsa-miR-196a         | -3,68     | 0,24        | 0,00        |
| hsa-miR-218          | -3,68     | 0,17        | 0,00        |
| hsa-miR-23b          | -3,66     | 0,24        | 0,00        |
| hsa-miR-100          | -3,62     | 0,15        | 0,00        |
| hsa-miR-149          | -3,44     | 0,12        | 0,00        |
| hsa-miR-140          | -3,39     | 0,32        | 0,00        |
| hsa-miR-30e-3p       | -3,32     | 0,28        | 0,00        |
| hsa-miR-145          | -3,22     | 0,19        | 0,00        |
| hsa-miR-214          | -3,15     | 0,28        | 0,00        |
| hsa-miR-335          | -3,10     | 0,22        | 0,00        |
| hsa-miR-26b          | -2,99     | 0,32        | 0,00        |
| hsa-miR-196b         | -2,98     | 0,23        | 0,00        |
| hsa-miR-101          | -2,95     | 0,27        | 0,00        |
| hsa-miR-615          | -2,89     | 0,22        | 0,00        |
| hsa-miR-10b          | -2,77     | 0,27        | 0,00        |
| hsa-let-7b           | -2,66     | 0,35        | 0,00        |
| hsa-miR-29a          | -2,60     | 0,42        | 0,00        |
| hsa-miR-197          | -2,59     | 0,39        | 0,00        |
| hsa-miR-125a         | -2,58     | 0,33        | 0,00        |
| hsa-miR-451          | -2,55     | 0,14        | 0,00        |
| hsa-miR-126          | -2,48     | 0,30        | 0,00        |
| hsa-miR-486          | -2,47     | 0,15        | 0,00        |
| hsa-miR-30c          | -2,42     | 0,37        | 0,00        |
| hsa-miR-211          | -2,40     | 0,28        | 0,00        |
| hsa-miR-130a         | -2,24     | 0,44        | 0,00        |
| hsa-miR-152          | -2,17     | 0,52        | 0,00        |
| hsa-let-7a           | -2,16     | 0,39        | 0,00        |
| hsa-miR-99b          | -2,15     | 0,39        | 0,00        |
| hsa-miR-30b          | -2,12     | 0,43        | 0,00        |
| hsa-miR-127          | -1,82     | 0,48        | 0,83        |
| hsa-let-7d           | -1,78     | 0,48        | 0,83        |
| hsa-miR-378          | -1,71     | 0,38        | 1,53        |
| hsa-let-7f           | -1,70     | 0,54        | 1,53        |
| hsa-miR-148a         | -1,66     | 0,47        | 1,53        |
| hsa-miR-23a          | -1,57     | 0,51        | 1,53        |
| hsa-miR-423          | -1,56     | 0,51        | 1,53        |
| hsa-miR-139          | -1,44     | 0,49        | 1,53        |
| hsa-miR-16           | -1,27     | 0,58        | 2,4         |

Supplementary table S2. MicroRNA families deregulated in cSCC compared to healthy skin.

| <i>miRNA families</i> | <i>Deregulated members in SCC</i> | <i>Genomic loci</i>                                                              |
|-----------------------|-----------------------------------|----------------------------------------------------------------------------------|
| <b>let-7</b>          | let-7a                            | 9:96938239-96938318 [+]/ 11: 122022937-122023016 [-] / 22: 46508629-46508702 [+] |
|                       | let-7b                            | 22: 46509566-46509648 [+]                                                        |
|                       | let-7c                            | 21: 17912148-17912231 [+]                                                        |
|                       | let-7d                            | 9: 96941116-96941202 [+]                                                         |
|                       | let-7f                            | 9: 96938629-96938715 [+] / X: 53584153-53584235 [-]                              |
|                       | let-7g                            | 3: 52302294-52302377 [-]                                                         |
| <b>miR-125b</b>       | miR-125a                          | 19: 52196507-52196592 [+]                                                        |
|                       | miR-125b                          | 11: 121970465-121970552 [-] / 21: 17962557-17962645 [+]                          |
| <b>miR-10</b>         | miR-10a                           | 17: 46657200-46657309 [-]                                                        |
|                       | miR-10b                           | 2: 177015031-177015140 [+]                                                       |
| <b>miR-199</b>        | miR-199a                          | 19: 10928102-10928172 [-] / 1: 172113675-172113784 [-]                           |
|                       | miR-199b                          | 9: 131007000-131007109 [-]                                                       |
| <b>miR-99</b>         | miR-99a                           | 21: 17911409-17911489 [+]                                                        |
|                       | miR-99b                           | 19: 52195865-52195934 [+]                                                        |
|                       | miR-100                           | 11: 122022937-122023016 [-]                                                      |
| <b>miR-16</b>         | miR-16                            | 13: 50623109-50623197 [-] / 3: 160122533-160122613 [+]                           |
|                       | miR-195                           | 17: 6920934-6921020 [-]                                                          |
| <b>miR-30</b>         | miR-30a                           | 6: 72113254-72113324 [-]                                                         |
|                       | miR-30b                           | 8: 135812763-135812850 [-]                                                       |
|                       | miR-30c                           | 1: 41222956-41223044 [+]/ 6: 72086663-72086734 [-]                               |
|                       | miR-30e                           | 1: 41220027-41220118 [+]                                                         |
| <b>miR-196</b>        | miR-196a                          | 17: 46709852-46709921 [-] / 12: 54385522-54385631 [+]                            |
|                       | miR-196b                          | 7: 27209099-27209182 [-]                                                         |
| <b>miR-23</b>         | miR-23a                           | 19: 13947401-13947473 [-]                                                        |
|                       | miR-23b                           | 9: 97847490-97847586 [+]                                                         |
| <b>miR-29</b>         | miR-29a                           | 7: 130561506-130561569 [-]                                                       |
|                       | miR-29b                           | 7: 130562218-130562298 [-] / 1: 207975788-207975868 [-]                          |
| <b>miR-26</b>         | miR-26a                           | 3: 38010895-38010971 [+]/ 12: 58218392-58218475 [-]                              |
|                       | miR-26b                           | 2: 219267369-219267445 [+]                                                       |
| <b>miR-148</b>        | miR-148a                          | 7: 25989539-25989606 [-]                                                         |
|                       | miR-152                           | 17: 46114527-46114613 [-]                                                        |

Note: the miRNAs with close genomic loci (<10kb) are highlighted in same color.

**Table S3: miR-125b regulated transcripts**

The potential targets of miR-125b predicted by miRWalk are labeled in red.

| Pre-miR-125b |          |          |      | Pre-miR-Ctrl |          |          |      | Fold change<br>(miR-125b vs<br>miR-Ctrl) | p-value | Gene Assignment |            |                                                                                                        |
|--------------|----------|----------|------|--------------|----------|----------|------|------------------------------------------|---------|-----------------|------------|--------------------------------------------------------------------------------------------------------|
| Sample 1     | Sample 2 | Sample 3 | Mean | Sample 1     | Sample 2 | Sample 3 | Mean |                                          |         | ID              | Symbol     | Name                                                                                                   |
| 20           | 23       | 22       | 22   | 37           | 40       | 32       | 36   | -1.65                                    | 0.004   | NM_006674       | HCP5       | HLA complex P5                                                                                         |
| 187          | 210      | 274      | 224  | 394          | 314      | 379      | 363  | -1.62                                    | 0.018   | NM_022156       | DUS1L      | dihydrouridine synthase 1-like ( <i>S. cerevisiae</i> )                                                |
| 47           | 50       | 38       | 45   | 77           | 60       | 76       | 71   | -1.58                                    | 0.017   | NM_001920       | DCN        | decorin                                                                                                |
| 32           | 32       | 21       | 29   | 46           | 41       | 40       | 42   | -1.49                                    | 0.029   | NM_002427       | MMP13      | matrix metalloproteinase 13 (collagenase 3)                                                            |
| 20           | 22       | 21       | 21   | 30           | 28       | 33       | 31   | -1.48                                    | 0.002   | NM_001012642    | GRAMD2     | GRAM domain containing 2                                                                               |
| 56           | 35       | 40       | 43   | 62           | 60       | 69       | 64   | -1.47                                    | 0.039   | NM_032681       | SPRY5      | SPRY domain containing 5                                                                               |
| 73           | 56       | 63       | 64   | 92           | 84       | 107      | 94   | -1.47                                    | 0.022   | NM_013275       | ANKRD11    | ankyrin repeat domain 11                                                                               |
| 430          | 490      | 581      | 500  | 676          | 859      | 671      | 735  | -1.47                                    | 0.036   | NM_005949       | MT1F       | metallothionein 1F                                                                                     |
| 35           | 29       | 36       | 33   | 53           | 52       | 40       | 49   | -1.46                                    | 0.029   | NM_005268       | GJB5       | gap junction protein, beta 5, 31.1kDa                                                                  |
| 42           | 34       | 40       | 39   | 56           | 51       | 64       | 57   | -1.46                                    | 0.016   | NR_026869       | NCRNA00052 | non-protein coding RNA 52                                                                              |
| 43           | 45       | 57       | 49   | 73           | 72       | 66       | 70   | -1.45                                    | 0.012   | NM_130459       | TOR2A      | torsin family 2, member A                                                                              |
| 40           | 32       | 33       | 35   | 46           | 59       | 48       | 51   | -1.44                                    | 0.027   | NM_002423       | MMP7       | matrix metalloproteinase 7 (matrilysin, uterine)                                                       |
| 54           | 56       | 75       | 61   | 95           | 84       | 86       | 88   | -1.44                                    | 0.022   | NM_002257       | KLK1       | kallikrein 1                                                                                           |
| 84           | 79       | 90       | 84   | 133          | 97       | 128      | 119  | -1.42                                    | 0.041   | NM_005985       | SNAI1      | snail homolog 1 ( <i>Drosophila</i> )                                                                  |
| 644          | 627      | 571      | 614  | 855          | 885      | 859      | 866  | -1.41                                    | 0.000   | NM_001127605    | LIPA       | lipase A, lysosomal acid, cholesterol esterase                                                         |
| 280          | 258      | 293      | 277  | 381          | 393      | 383      | 386  | -1.39                                    | 0.001   | NM_001102402    | PCTP       | phosphatidylcholine transfer protein                                                                   |
| 689          | 730      | 1034     | 818  | 1164         | 1125     | 1093     | 1127 | -1.38                                    | 0.049   | NM_138442       | CCDC124    | coiled-coil domain containing 124                                                                      |
| 323          | 324      | 305      | 317  | 448          | 425      | 436      | 436  | -1.38                                    | 0.000   | NM_001150       | ANPEP      | alanyl (membrane) aminopeptidase                                                                       |
| 170          | 187      | 219      | 192  | 295          | 232      | 264      | 264  | -1.37                                    | 0.037   | NM_014232       | VAMP2      | vesicle-associated membrane protein 2 (synaptobrevin 2)                                                |
| 118          | 120      | 148      | 129  | 193          | 152      | 185      | 177  | -1.37                                    | 0.039   | NM_000116       | TAZ        | tafazzin                                                                                               |
| 341          | 359      | 426      | 375  | 540          | 504      | 498      | 514  | -1.37                                    | 0.009   | NM_078467       | CDKN1A     | cyclin-dependent kinase inhibitor 1A (p21, Cip1)                                                       |
| 79           | 83       | 98       | 86   | 135          | 114      | 104      | 118  | -1.36                                    | 0.043   | NM_006103       | WFDC2      | WAP four-disulfide core domain 2                                                                       |
| 64           | 66       | 74       | 68   | 96           | 96       | 87       | 93   | -1.36                                    | 0.005   | NM_182757       | RNF144B    | ring finger protein 144B                                                                               |
| 94           | 104      | 110      | 103  | 132          | 150      | 137      | 139  | -1.35                                    | 0.007   | NM_002781       | PSG5       | pregnancy specific beta-1-glycoprotein 5                                                               |
| 23           | 19       | 24       | 22   | 31           | 29       | 31       | 30   | -1.35                                    | 0.008   | XM_001714063    | LOC642776  | hypothetical protein LOC642776                                                                         |
| 44           | 39       | 54       | 46   | 64           | 56       | 64       | 61   | -1.34                                    | 0.038   | AK128439        | VAC14      | Vac14 homolog ( <i>S. cerevisiae</i> )                                                                 |
| 48           | 46       | 48       | 47   | 60           | 72       | 59       | 63   | -1.34                                    | 0.018   | BC002752        | C11orf67   | chromosome 11 open reading frame 67                                                                    |
| 68           | 67       | 80       | 72   | 89           | 107      | 92       | 96   | -1.34                                    | 0.025   | NM_004389       | CTNNA2     | catenin (cadherin-associated protein), alpha 2                                                         |
| 41           | 33       | 34       | 36   | 47           | 45       | 52       | 48   | -1.33                                    | 0.026   | NM_030915       | LBH        | limb bud and heart development homolog (mouse)                                                         |
| 129          | 123      | 111      | 121  | 154          | 168      | 161      | 161  | -1.33                                    | 0.004   | NM_080740       | ZNF280A    | zinc finger protein 280A                                                                               |
| 135          | 124      | 105      | 121  | 167          | 152      | 164      | 161  | -1.33                                    | 0.017   | NM_033285       | TP53INP1   | tumor protein p53 inducible nuclear protein 1                                                          |
| 73           | 60       | 71       | 68   | 91           | 92       | 87       | 90   | -1.33                                    | 0.006   | NM_015892       | CHST15     | carbohydrate (N-acetylgalactosamine 4-sulfate 6-O) sulfotransferase 15                                 |
| 224          | 252      | 275      | 250  | 322          | 363      | 309      | 332  | -1.32                                    | 0.021   | NM_001785       | CDA        | cytidine deaminase                                                                                     |
| 72           | 71       | 81       | 75   | 106          | 101      | 89       | 99   | -1.32                                    | 0.014   | NM_148886       | SMCR7      | Smith-Magenis syndrome chromosome region, candidate 7                                                  |
| 342          | 322      | 313      | 326  | 458          | 438      | 396      | 431  | -1.32                                    | 0.007   | NM_024111       | CHAC1      | ChaC, cation transport regulator homolog 1 ( <i>E. coli</i> )                                          |
| 149          | 166      | 185      | 167  | 222          | 209      | 227      | 219  | -1.32                                    | 0.011   | NM_001860       | SLC31A2    | solute carrier family 31 (copper transporters), member 2                                               |
| 79           | 83       | 94       | 85   | 117          | 101      | 118      | 112  | -1.31                                    | 0.020   | NM_015299       | KHNYN      | KH and NYN domain containing                                                                           |
| 168          | 148      | 159      | 158  | 209          | 200      | 214      | 208  | -1.31                                    | 0.002   | NM_007260       | LYPLA2     | lysophospholipase II                                                                                   |
| 40           | 39       | 49       | 42   | 58           | 59       | 50       | 56   | -1.31                                    | 0.032   | NM_001040167    | LFNG       | LFNG O-fucosylpeptide 3-beta-N-acetylglucosaminyltransferase                                           |
| 88           | 82       | 86       | 85   | 114          | 102      | 118      | 111  | -1.30                                    | 0.008   | NM_014901       | RNF44      | ring finger protein 44                                                                                 |
|              |          |          |      |              |          |          |      |                                          |         |                 |            | serpin peptidase inhibitor, clade F (alpha-2 antiplasmin, pigment epithelium derived factor), member 1 |
| 43           | 35       | 33       | 37   | 51           | 46       | 46       | 48   | -1.30                                    | 0.035   | NM_002615       | SERPINF1   | serpin peptidase inhibitor, clade F (alpha-2 antiplasmin, pigment epithelium derived factor), member 1 |
| 62           | 65       | 73       | 67   | 77           | 98       | 85       | 87   | -1.30                                    | 0.048   | NM_017421       | COQ3       | coenzyme Q3 homolog, methyltransferase ( <i>S. cerevisiae</i> )                                        |
| 47           | 44       | 37       | 42   | 57           | 52       | 57       | 55   | -1.30                                    | 0.021   | NM_199136       | C7orf46    | chromosome 7 open reading frame 46                                                                     |
| 58           | 64       | 57       | 60   | 72           | 79       | 80       | 77   | -1.30                                    | 0.006   | NM_020405       | PLXDC1     | plexin domain containing 1                                                                             |
| 98           | 120      | 115      | 111  | 136          | 151      | 146      | 144  | -1.30                                    | 0.015   | NM_001252       | CD70       | CD70 molecule                                                                                          |
| 234          | 230      | 204      | 223  | 287          | 299      | 279      | 288  | -1.29                                    | 0.004   | NM_003474       | ADAM12     | ADAM metalloproteinase domain 12                                                                       |
| 709          | 715      | 843      | 756  | 920          | 1078     | 935      | 977  | -1.29                                    | 0.029   | NM_175617       | MT1E       | metallothionein 1E                                                                                     |
| 83           | 101      | 116      | 100  | 127          | 125      | 136      | 129  | -1.29                                    | 0.045   | NM_017410       | HOXC13     | homeobox C13                                                                                           |

|     |     |     |     |     |     |     |     |       |       |              |           |                                                                                                                  |
|-----|-----|-----|-----|-----|-----|-----|-----|-------|-------|--------------|-----------|------------------------------------------------------------------------------------------------------------------|
| 143 | 148 | 167 | 152 | 209 | 189 | 192 | 197 | -1.29 | 0.010 | NM_152739    | HOXA9     | homeobox A9                                                                                                      |
| 88  | 92  | 121 | 101 | 126 | 133 | 130 | 130 | -1.29 | 0.049 | NM_001003927 | EVI2A     | ecotropic viral integration site 2A                                                                              |
| 39  | 43  | 54  | 45  | 56  | 60  | 60  | 59  | -1.29 | 0.049 | NR_027471    | LOC440173 | hypothetical LOC440173                                                                                           |
| 307 | 359 | 403 | 356 | 463 | 497 | 416 | 458 | -1.29 | 0.049 | NM_020992    | PDLIM1    | PDZ and LIM domain 1                                                                                             |
| 43  | 36  | 43  | 41  | 48  | 55  | 54  | 52  | -1.29 | 0.023 | XM_001714030 | LOC642838 | similar to hCG1742442                                                                                            |
| 79  | 75  | 90  | 81  | 105 | 96  | 112 | 104 | -1.28 | 0.021 | NM_020127    | TUFT1     | tuftelin 1                                                                                                       |
| 627 | 600 | 736 | 654 | 793 | 924 | 802 | 840 | -1.28 | 0.035 | NM_002488    | NDUFA2    | NADH dehydrogenase (ubiquinone) 1 alpha subcomplex, 2, 8kDa                                                      |
| 92  | 88  | 115 | 98  | 117 | 132 | 130 | 126 | -1.28 | 0.046 | NM_001870    | CPA3      | carboxypeptidase A3 (mast cell)                                                                                  |
| 348 | 377 | 373 | 366 | 459 | 473 | 473 | 469 | -1.28 | 0.001 | NM_020453    | ATP10D    | ATPase, class V, type 10D                                                                                        |
| 35  | 40  | 39  | 38  | 51  | 49  | 46  | 49  | -1.28 | 0.008 | NM_001134407 | GRIN2A    | glutamate receptor, ionotropic, N-methyl D-aspartate 2A                                                          |
| 74  | 66  | 68  | 69  | 98  | 89  | 78  | 89  | -1.28 | 0.038 | NM_032681    | SPRYD5    | SPRY domain containing 5                                                                                         |
| 47  | 44  | 46  | 46  | 62  | 57  | 57  | 58  | -1.28 | 0.002 | NM_001033551 | TOM1L2    | target of myb1-like 2 (chicken)                                                                                  |
| 81  | 75  | 86  | 81  | 100 | 111 | 97  | 103 | -1.28 | 0.016 | NM_014415    | ZBTB11    | zinc finger and BTB domain containing 11                                                                         |
| 701 | 764 | 683 | 716 | 897 | 996 | 845 | 913 | -1.27 | 0.018 | NR_015379    | UCA1      | urothelial cancer associated 1 (non-protein coding)                                                              |
| 21  | 26  | 26  | 24  | 28  | 30  | 33  | 31  | -1.27 | 0.037 | NM_017893    | SEMA4G    | sema domain, immunoglobulin domain (Ig), transmembrane domain (TM) and short cytoplasmic domain, (semaphorin) 4G |

|     |     |     |     |     |     |     |     |       |       |                 |              |                                                                                                                                                          |
|-----|-----|-----|-----|-----|-----|-----|-----|-------|-------|-----------------|--------------|----------------------------------------------------------------------------------------------------------------------------------------------------------|
| 76  | 84  | 90  | 83  | 98  | 114 | 106 | 106 | -1.27 | 0.019 | NM_004106       | FCER1G       | Fc fragment of IgE, high affinity I, receptor for; gamma polypeptide                                                                                     |
| 85  | 74  | 96  | 85  | 108 | 103 | 113 | 108 | -1.27 | 0.028 | NM_014729       | TOX          | thymocyte selection-associated high mobility group box                                                                                                   |
| 29  | 30  | 25  | 28  | 40  | 34  | 32  | 35  | -1.27 | 0.050 | NM_001178061    | SEMA6C       | sema domain, transmembrane domain (TM), and cytoplasmic domain, (semaphorin) 6C                                                                          |
| 163 | 158 | 183 | 168 | 223 | 211 | 205 | 213 | -1.27 | 0.008 | NM_198723       | TCEA2        | transcription elongation factor A (SII), 2                                                                                                               |
| 23  | 30  | 27  | 27  | 31  | 34  | 37  | 34  | -1.27 | 0.049 | NM_203370       | C3orf54      | chromosome 3 open reading frame 54                                                                                                                       |
| 200 | 197 | 242 | 213 | 276 | 253 | 282 | 270 | -1.27 | 0.027 | NM_001141969    | DAXX         | death-domain associated protein                                                                                                                          |
| 63  | 77  | 63  | 68  | 82  | 91  | 84  | 86  | -1.27 | 0.028 | NM_032740       | SFT2D3       | SFT2 domain containing 3                                                                                                                                 |
| 194 | 192 | 235 | 207 | 267 | 246 | 273 | 262 | -1.27 | 0.028 | NM_001141969    | DAXX         | death-domain associated protein                                                                                                                          |
| 24  | 23  | 24  | 24  | 29  | 28  | 33  | 30  | -1.27 | 0.012 | AF258550        | LOC100129503 | hypothetical protein LOC100129503                                                                                                                        |
| 113 | 94  | 87  | 98  | 130 | 121 | 120 | 124 | -1.26 | 0.034 | NM_152321       | ERP27        | endoplasmic reticulum protein 27                                                                                                                         |
| 204 | 204 | 248 | 219 | 281 | 258 | 289 | 276 | -1.26 | 0.030 | NM_001141969    | DAXX         | death-domain associated protein                                                                                                                          |
| 62  | 65  | 58  | 62  | 79  | 83  | 72  | 78  | -1.26 | 0.011 | NM_016835       | MAPT         | microtubule-associated protein tau                                                                                                                       |
| 197 | 207 | 243 | 216 | 277 | 281 | 259 | 272 | -1.26 | 0.022 | NM_001134375    | CCNJ         | cyclin J                                                                                                                                                 |
| 127 | 133 | 135 | 131 | 170 | 159 | 169 | 166 | -1.26 | 0.001 | NM_015997       | C1orf66      | chromosome 1 open reading frame 66                                                                                                                       |
| 88  | 82  | 95  | 88  | 116 | 102 | 115 | 111 | -1.26 | 0.017 | NR_002592       | SNORD96A     | small nucleolar RNA, C/D box 96A                                                                                                                         |
| 83  | 84  | 84  | 84  | 108 | 103 | 103 | 105 | -1.25 | 0.000 | NM_000355       | TCN2         | transcobalamin II                                                                                                                                        |
| 390 | 388 | 460 | 413 | 528 | 531 | 495 | 518 | -1.25 | 0.016 | NM_004656       | BAP1         | BRCA1 associated protein-1 (ubiquitin carboxy-terminal hydrolase)                                                                                        |
| 29  | 27  | 28  | 28  | 40  | 34  | 32  | 35  | -1.25 | 0.044 | NM_021133       | RNASEL       | ribonuclease L (2',5'-oligoadenylate synthetase-dependent)                                                                                               |
| 183 | 179 | 220 | 194 | 246 | 255 | 229 | 243 | -1.25 | 0.032 | NM_015533       | DAK          | dihydroxyacetone kinase 2 homolog (S. cerevisiae)                                                                                                        |
| 133 | 145 | 170 | 150 | 199 | 172 | 192 | 188 | -1.25 | 0.048 | NM_001080826    | SGK223       | homolog of rat pragma of Rnd2                                                                                                                            |
| 96  | 91  | 92  | 93  | 118 | 117 | 114 | 116 | -1.25 | 0.000 | NM_178858       | SFXN2        | sideroflexin 2                                                                                                                                           |
| 56  | 52  | 54  | 54  | 74  | 60  | 67  | 67  | -1.25 | 0.032 | NM_023072       | ZSWIM4       | zinc finger, SWIM-type containing 4                                                                                                                      |
| 398 | 382 | 387 | 389 | 484 | 514 | 462 | 487 | -1.25 | 0.004 | NM_000326       | RLBP1        | retinaldehyde binding protein 1                                                                                                                          |
| 39  | 33  | 41  | 38  | 48  | 45  | 48  | 47  | -1.25 | 0.020 | NM_005420       | SULT1E1      | sulfotransferase family 1E, estrogen-preferring, member 1                                                                                                |
| 162 | 154 | 169 | 162 | 207 | 204 | 196 | 202 | -1.25 | 0.002 | NM_023948       | MOSPD3       | motile sperm domain containing 3                                                                                                                         |
| 222 | 236 | 252 | 237 | 283 | 275 | 329 | 296 | -1.25 | 0.035 | NM_144576       | COQ10A       | coenzyme Q10 homolog A (S. cerevisiae)                                                                                                                   |
| 41  | 35  | 43  | 40  | 50  | 53  | 46  | 49  | -1.25 | 0.036 | NM_145047       | OSCP1        | organic solute carrier partner 1                                                                                                                         |
| 219 | 239 | 224 | 227 | 294 | 268 | 289 | 284 | -1.25 | 0.005 | NM_016472       | C14orf129    | chromosome 14 open reading frame 129<br>mitochondria-associated protein involved in granulocyte-macrophage colony-stimulating factor signal transduction |
| 75  | 76  | 93  | 81  | 105 | 97  | 103 | 102 | -1.25 | 0.038 | NM_016069       | TIMM16       | factor signal transduction                                                                                                                               |
| 112 | 104 | 115 | 111 | 136 | 132 | 146 | 138 | -1.25 | 0.006 | NM_153631       | HOXA3        | homeobox A3                                                                                                                                              |
| 41  | 37  | 40  | 39  | 46  | 51  | 51  | 49  | -1.25 | 0.009 | ENST00000377425 | AQP7         | aquaporin 7                                                                                                                                              |
| 106 | 93  | 88  | 96  | 115 | 121 | 121 | 119 | -1.25 | 0.015 | NM_004727       | SLC24A1      | solute carrier family 24 (sodium/potassium/calcium exchanger), member 1                                                                                  |
| 294 | 283 | 356 | 311 | 405 | 379 | 379 | 388 | -1.25 | 0.034 | NM_025232       | REEP4        | receptor accessory protein 4                                                                                                                             |
| 119 | 130 | 141 | 130 | 157 | 165 | 164 | 162 | -1.25 | 0.010 | AK291605        | FAM115A      | family with sequence similarity 115, member A                                                                                                            |
| 202 | 182 | 196 | 193 | 242 | 236 | 245 | 241 | -1.25 | 0.002 | NM_053025       | MYLK         | myosin light chain kinase                                                                                                                                |
| 69  | 71  | 72  | 71  | 89  | 91  | 84  | 88  | -1.24 | 0.002 | NM_033544       | RCCD1        | RCC1 domain containing 1                                                                                                                                 |
| 178 | 142 | 182 | 168 | 194 | 216 | 216 | 209 | -1.24 | 0.048 | NM_198476       | C19orf54     | chromosome 19 open reading frame 54                                                                                                                      |
| 280 | 264 | 227 | 257 | 318 | 312 | 329 | 320 | -1.24 | 0.019 | NM_000888       | ITGB6        | integrin, beta 6                                                                                                                                         |
| 448 | 419 | 435 | 434 | 543 | 561 | 516 | 540 | -1.24 | 0.002 | NM_002466       | MYBL2        | v-myb myeloblastosis viral oncogene homolog (avian)-like 2                                                                                               |
| 161 | 153 | 169 | 161 | 203 | 201 | 196 | 200 | -1.24 | 0.001 | NM_153603       | COG7         | component of oligomeric golgi complex 7                                                                                                                  |
| 181 | 193 | 186 | 187 | 242 | 230 | 225 | 232 | -1.24 | 0.002 | NM_005155       | PPT2         | palmitoyl-protein thioesterase 2                                                                                                                         |
| 179 | 190 | 184 | 184 | 238 | 226 | 222 | 229 | -1.24 | 0.002 | NM_005155       | PPT2         | palmitoyl-protein thioesterase 2                                                                                                                         |
| 117 | 117 | 117 | 117 | 144 | 147 | 146 | 145 | -1.24 | 0.000 | NM_003427       | ZNF76        | zinc finger protein 76 (expressed in testis)                                                                                                             |
| 210 | 213 | 242 | 222 | 295 | 251 | 279 | 275 | -1.24 | 0.032 | NM_022822       | KLC2         | kinesin light chain 2                                                                                                                                    |
| 83  | 80  | 71  | 78  | 96  | 103 | 90  | 96  | -1.24 | 0.021 | NM_014211       | GABRP        | gamma-aminobutyric acid (GABA) A receptor, pi                                                                                                            |
| 46  | 37  | 39  | 40  | 49  | 53  | 48  | 50  | -1.24 | 0.034 | NM_024584       | CCDC121      | coiled-coil domain containing 121                                                                                                                        |
| 67  | 60  | 56  | 61  | 76  | 74  | 77  | 76  | -1.24 | 0.010 | NM_145176       | SLC2A12      | solute carrier family 2 (facilitated glucose transporter), member 12                                                                                     |
| 111 | 122 | 128 | 120 | 147 | 135 | 165 | 149 | -1.24 | 0.048 | NM_205767       | C19orf70     | chromosome 19 open reading frame 70                                                                                                                      |
| 113 | 124 | 108 | 115 | 142 | 145 | 140 | 142 | -1.24 | 0.005 | NM_003275       | TMOD1        | tropomodulin 1                                                                                                                                           |
| 54  | 50  | 45  | 50  | 61  | 58  | 65  | 61  | -1.24 | 0.018 | NM_000808       | GABRA3       | gamma-aminobutyric acid (GABA) A receptor, alpha 3                                                                                                       |
| 119 | 125 | 127 | 124 | 153 | 160 | 145 | 153 | -1.24 | 0.004 | NM_024701       | ASB13        | ankyrin repeat and SOCS box-containing 13                                                                                                                |
| 107 | 88  | 106 | 100 | 125 | 117 | 130 | 124 | -1.24 | 0.033 | NM_022909       | CENPH        | centromere protein H                                                                                                                                     |
| 471 | 426 | 501 | 466 | 550 | 547 | 631 | 576 | -1.24 | 0.036 | NM_017612       | ZCCHC8       | zinc finger, CCHC domain containing 8                                                                                                                    |

|      |      |      |      |      |      |      |      |       |       |                              |                       |                                                        |
|------|------|------|------|------|------|------|------|-------|-------|------------------------------|-----------------------|--------------------------------------------------------|
| 43   | 38   | 42   | 41   | 47   | 53   | 52   | 51   | -1.24 | 0.013 | <a href="#">XM_001714030</a> | LOC642838             | similar to hCG1742442                                  |
| 56   | 53   | 55   | 55   | 71   | 68   | 63   | 67   | -1.24 | 0.009 | <a href="#">NM_004934</a>    | CDH18                 | cadherin 18, type 2                                    |
| 73   | 62   | 67   | 67   | 86   | 83   | 80   | 83   | -1.23 | 0.014 | <a href="#">NM_145252</a>    | ZG16B                 | zymogen granule protein 16 homolog B (rat)             |
| 75   | 71   | 64   | 70   | 93   | 89   | 77   | 86   | -1.23 | 0.044 | <a href="#">NM_032709</a>    | PYROXD2               | pyridine nucleotide-disulphide oxidoreductase domain 2 |
| 93   | 84   | 90   | 89   | 117  | 105  | 108  | 110  | -1.23 | 0.009 | <a href="#">NM_145111</a>    | FAM200A               | family with sequence similarity 200, member A          |
| 67   | 65   | 72   | 68   | 82   | 87   | 82   | 84   | -1.23 | 0.005 | <a href="#">NR_002803</a>    | RPL13P5               | ribosomal protein L13 pseudogene 5                     |
| 1484 | 1348 | 1160 | 1331 | 1644 | 1666 | 1608 | 1639 | -1.23 | 0.032 | <a href="#">NM_006472</a>    | <a href="#">TXNIP</a> | thioredoxin interacting protein                        |
| 33   | 31   | 34   | 33   | 40   | 45   | 37   | 40   | -1.23 | 0.035 | <a href="#">NM_001195</a>    | BFSP1                 | beaded filament structural protein 1, filensin         |
| 169  | 155  | 164  | 163  | 182  | 201  | 218  | 200  | -1.23 | 0.029 | <a href="#">NM_000968</a>    | RPL4                  | ribosomal protein L4                                   |
| 126  | 123  | 121  | 123  | 155  | 153  | 147  | 152  | -1.23 | 0.001 | <a href="#">NM_020204</a>    | <a href="#">LHX9</a>  | LIM homeobox 9                                         |
| 86   | 77   | 80   | 81   | 104  | 93   | 102  | 100  | -1.23 | 0.012 | <a href="#">NM_004205</a>    | <a href="#">USP2</a>  | ubiquitin specific peptidase 2                         |
| 165  | 169  | 200  | 178  | 211  | 235  | 209  | 219  | -1.23 | 0.042 | <a href="#">NM_018073</a>    | TRIM68                | tripartite motif-containing 68                         |
| 169  | 191  | 188  | 183  | 229  | 235  | 208  | 224  | -1.23 | 0.017 | <a href="#">NM_005371</a>    | METTL1                | methyltransferase like 1                               |
| 294  | 285  | 346  | 308  | 365  | 399  | 370  | 378  | -1.23 | 0.032 | <a href="#">NM_016352</a>    | CPA4                  | carboxypeptidase A4                                    |

|      |      |      |      |      |      |      |      |       |       |              |              |                                                                         |
|------|------|------|------|------|------|------|------|-------|-------|--------------|--------------|-------------------------------------------------------------------------|
| 96   | 99   | 105  | 100  | 132  | 127  | 109  | 123  | -1.22 | 0.037 | NM_032501    | ACSS1        | acyl-CoA synthetase short-chain family member 1                         |
| 271  | 295  | 343  | 303  | 388  | 374  | 350  | 371  | -1.22 | 0.046 | NM_015926    | TEX264       | testis expressed 264                                                    |
| 90   | 95   | 90   | 92   | 109  | 119  | 109  | 112  | -1.22 | 0.005 | NM_080424    | SP110        | SP110 nuclear body protein                                              |
| 146  | 152  | 148  | 148  | 195  | 174  | 175  | 181  | -1.22 | 0.010 | NM_005133    | RCE1         | RCE1 homolog, prenyl protein peptidase (S. cerevisiae)                  |
| 261  | 236  | 247  | 248  | 310  | 272  | 326  | 303  | -1.22 | 0.035 | NM_032510    | PARD6G       | par-6 partitioning defective 6 homolog gamma (C. elegans)               |
| 727  | 733  | 847  | 769  | 1009 | 891  | 915  | 939  | -1.22 | 0.033 | NM_005053    | RAD23A       | RAD23 homolog A (S. cerevisiae)                                         |
| 40   | 37   | 39   | 39   | 43   | 49   | 50   | 47   | -1.22 | 0.019 | XM_001715084 | LOC100132426 | similar to hCG1742442                                                   |
| 42   | 46   | 44   | 44   | 60   | 49   | 53   | 54   | -1.22 | 0.041 | NM_207396    | RNF207       | ring finger protein 207                                                 |
| 1557 | 1714 | 1861 | 1711 | 2040 | 2185 | 2030 | 2085 | -1.22 | 0.021 | NM_012106    | ARL2BP       | ADP-ribosylation factor-like 2 binding protein                          |
| 180  | 189  | 207  | 192  | 242  | 223  | 237  | 234  | -1.22 | 0.013 | NM_025069    | ZNF703       | zinc finger protein 703                                                 |
| 57   | 58   | 70   | 62   | 77   | 77   | 71   | 75   | -1.22 | 0.045 | NM_178836    | PLD6         | phospholipase D family, member 6                                        |
| 77   | 75   | 68   | 73   | 90   | 92   | 85   | 89   | -1.21 | 0.010 | NM_012219    | MRAS         | muscle RAS oncogene homolog                                             |
| 165  | 165  | 171  | 167  | 199  | 206  | 203  | 203  | -1.21 | 0.000 | NM_052897    | MBD6         | methyl-CpG binding domain protein 6                                     |
| 133  | 136  | 162  | 144  | 177  | 174  | 172  | 174  | -1.21 | 0.028 | BC033660     | DBF4B        | DBF4 homolog B (S. cerevisiae)                                          |
| 685  | 694  | 779  | 719  | 850  | 930  | 835  | 872  | -1.21 | 0.022 | NM_006941    | SOX10        | SRY (sex determining region Y)-box 10                                   |
| 163  | 167  | 164  | 165  | 191  | 207  | 201  | 200  | -1.21 | 0.002 | NM_003102    | SOD3         | superoxide dismutase 3, extracellular                                   |
| 175  | 193  | 203  | 190  | 250  | 209  | 233  | 230  | -1.21 | 0.050 | NM_025010    | KLHL18       | kelch-like 18 (Drosophila)                                              |
| 67   | 76   | 80   | 75   | 85   | 91   | 95   | 90   | -1.21 | 0.032 | NM_002145    | HOXB2        | homeobox B2                                                             |
| 217  | 231  | 247  | 232  | 264  | 269  | 307  | 280  | -1.21 | 0.041 | NM_022778    | CCDC21       | coiled-coil domain containing 21                                        |
| 88   | 81   | 75   | 81   | 94   | 98   | 103  | 98   | -1.21 | 0.021 | NM_004099    | STOM         | stomatin                                                                |
| 191  | 183  | 195  | 190  | 234  | 223  | 231  | 229  | -1.21 | 0.001 | NM_001188    | BAK1         | BCL2-antagonist/killer 1                                                |
| 71   | 59   | 67   | 65   | 77   | 75   | 85   | 79   | -1.21 | 0.043 | NM_022717    | SNRNP35      | small nuclear ribonucleoprotein 35kDa (U11/U12)                         |
| 121  | 117  | 118  | 119  | 142  | 158  | 129  | 143  | -1.21 | 0.043 | NR_029192    | LOC100133315 | transient receptor potential cation channel, subfamily C, member 2-like |
| 521  | 592  | 649  | 587  | 747  | 690  | 687  | 708  | -1.21 | 0.045 | NM_002229    | JUNB         | jun B proto-oncogene                                                    |
| 352  | 372  | 394  | 372  | 471  | 442  | 433  | 449  | -1.21 | 0.010 | NM_014516    | CNOT3        | CCR4-NOT transcription complex, subunit 3                               |
| 484  | 533  | 589  | 536  | 629  | 661  | 646  | 646  | -1.21 | 0.026 | NM_032822    | FAM136A      | family with sequence similarity 136, member A                           |
| 67   | 63   | 59   | 63   | 79   | 74   | 74   | 76   | -1.20 | 0.010 | NM_000530    | MPZ          | myelin protein zero                                                     |
| 78   | 66   | 63   | 69   | 79   | 87   | 83   | 83   | -1.20 | 0.048 | NM_001040260 | DCLK2        | doublecortin-like kinase 2                                              |
| 105  | 100  | 110  | 105  | 131  | 116  | 131  | 126  | -1.20 | 0.022 | NM_014840    | NUAK1        | NUAK family, SNF1-like kinase, 1                                        |
| 30   | 28   | 30   | 29   | 32   | 38   | 36   | 35   | -1.20 | 0.041 | NM_153336    | PSTK         | phosphoserine-tRNA kinase                                               |
| 515  | 472  | 449  | 479  | 616  | 565  | 544  | 575  | -1.20 | 0.029 | NM_001024847 | TGFBR2       | transforming growth factor, beta receptor II (70/80kDa)                 |
| 106  | 115  | 124  | 115  | 136  | 143  | 134  | 138  | -1.20 | 0.017 | NM_032575    | GLIS2        | GLIS family zinc finger 2                                               |
| 238  | 217  | 265  | 240  | 288  | 291  | 285  | 288  | -1.20 | 0.026 | NM_031484    | MARVELD1     | MARVEL domain containing 1                                              |
| 285  | 256  | 297  | 280  | 341  | 310  | 356  | 336  | -1.20 | 0.037 | NM_022566    | MESDC1       | mesoderm development candidate 1                                        |
| 152  | 140  | 142  | 145  | 180  | 169  | 172  | 174  | -1.20 | 0.005 | NM_006129    | BMP1         | bone morphogenetic protein 1                                            |
| 378  | 397  | 421  | 399  | 475  | 499  | 462  | 479  | -1.20 | 0.008 | NM_002611    | PDK2         | pyruvate dehydrogenase kinase, isozyme 2                                |
| 326  | 301  | 288  | 305  | 357  | 374  | 366  | 366  | -1.20 | 0.008 | NM_173473    | ANAPC16      | anaphase promoting complex subunit 16                                   |
| 93   | 101  | 92   | 95   | 76   | 86   | 77   | 79   | 1.20  | 0.019 | XM_002345769 | HSBP1P2      | heat shock factor binding protein 1 pseudogene 2                        |
| 182  | 189  | 183  | 185  | 146  | 165  | 151  | 154  | 1.20  | 0.007 | CR590757     | RPL22P15     | ribosomal protein L22 pseudogene 15                                     |
| 135  | 122  | 117  | 125  | 108  | 102  | 101  | 104  | 1.20  | 0.024 | NM_019100    | DMAP1        | DNA methyltransferase 1 associated protein 1                            |
| 351  | 349  | 302  | 334  | 290  | 278  | 259  | 276  | 1.21  | 0.035 | NR_024060    | FAM27A       | family with sequence similarity 27, member A                            |
| 57   | 58   | 52   | 56   | 44   | 49   | 46   | 46   | 1.21  | 0.016 | NM_152379    | C1orf131     | chromosome 1 open reading frame 131                                     |
| 647  | 664  | 641  | 651  | 534  | 558  | 520  | 537  | 1.21  | 0.001 | NM_001146276 | NCEH1        | neutral cholesterol ester hydrolase 1                                   |
| 866  | 875  | 739  | 827  | 684  | 716  | 644  | 682  | 1.21  | 0.041 | NM_001040058 | SPP1         | secreted phosphoprotein 1                                               |
| 371  | 370  | 317  | 353  | 306  | 293  | 273  | 291  | 1.21  | 0.036 | NR_024060    | FAM27A       | family with sequence similarity 27, member A                            |
| 55   | 64   | 62   | 61   | 48   | 54   | 47   | 50   | 1.21  | 0.035 | NM_018378    | FBXL8        | F-box and leucine-rich repeat protein 8                                 |
| 338  | 328  | 279  | 315  | 272  | 258  | 246  | 259  | 1.22  | 0.047 | NR_027421    | FAM27C       | family with sequence similarity 27, member C                            |
| 316  | 330  | 294  | 313  | 225  | 264  | 280  | 257  | 1.22  | 0.044 | NM_012403    | ANP32C       | acidic (leucine-rich) nuclear phosphoprotein 32 family, member C        |
| 39   | 39   | 37   | 38   | 29   | 35   | 30   | 31   | 1.22  | 0.020 | NM_007030    | TPPP         | tubulin polymerization promoting protein                                |
| 793  | 807  | 801  | 800  | 670  | 671  | 621  | 654  | 1.22  | 0.001 | BC071678     | RPS18P9      | ribosomal protein S18 pseudogene 9                                      |
| 80   | 73   | 86   | 80   | 61   | 69   | 65   | 65   | 1.22  | 0.030 | NM_001444    | FABP5        | fatty acid binding protein 5 (psoriasis-associated)                     |
| 40   | 47   | 48   | 45   | 36   | 39   | 35   | 37   | 1.22  | 0.045 | NM_003322    | TULP1        | tubby like protein 1                                                    |
| 171  | 185  | 171  | 176  | 134  | 157  | 140  | 143  | 1.23  | 0.018 | BC034580     | SLC44A5      | solute carrier family 44, member 5                                      |
| 39   | 34   | 39   | 37   | 28   | 30   | 33   | 30   | 1.23  | 0.038 | NM_006665    | HPSE         | heparanase                                                              |
| 63   | 67   | 61   | 64   | 52   | 56   | 49   | 52   | 1.23  | 0.013 | NM_174936    | PCSK9        | proprotein convertase subtilisin/kexin type 9                           |
| 497  | 458  | 456  | 471  | 407  | 325  | 414  | 382  | 1.23  | 0.049 | NM_014399    | TSPAN13      | tetraspanin 13                                                          |



|      |      |      |      |      |      |      |      |      |       |                 |         |                                                                           |
|------|------|------|------|------|------|------|------|------|-------|-----------------|---------|---------------------------------------------------------------------------|
| 89   | 95   | 98   | 94   | 77   | 76   | 75   | 76   | 1.24 | 0.002 | NM_173808       | NEGR1   | neuronal growth regulator 1                                               |
| 430  | 464  | 435  | 443  | 360  | 315  | 398  | 358  | 1.24 | 0.032 | NM_057159       | LPAR1   | lysophosphatidic acid receptor 1                                          |
| 1230 | 1205 | 996  | 1144 | 923  | 940  | 908  | 924  | 1.24 | 0.042 | NM_002273       | KRT8    | keratin 8                                                                 |
| 233  | 241  | 196  | 223  | 180  | 178  | 183  | 180  | 1.24 | 0.037 | NM_019007       | ARMCX6  | armadillo repeat containing, X-linked 6                                   |
| 54   | 50   | 45   | 50   | 41   | 42   | 37   | 40   | 1.24 | 0.034 | AB042555        | PDE4DIP | phosphodiesterase 4D interacting protein                                  |
| 42   | 41   | 44   | 42   | 32   | 37   | 33   | 34   | 1.24 | 0.014 | NM_001145678    | C5orf36 | chromosome 5 open reading frame 36                                        |
| 95   | 90   | 95   | 93   | 80   | 82   | 63   | 75   | 1.25 | 0.040 | NM_014580       | SLC2A8  | solute carrier family 2 (facilitated glucose transporter), member 8       |
| 536  | 593  | 543  | 557  | 483  | 423  | 436  | 447  | 1.25 | 0.013 | NR_002918       | SNORA48 | small nucleolar RNA, H/ACA box 48                                         |
| 206  | 191  | 184  | 194  | 142  | 171  | 153  | 155  | 1.25 | 0.023 | NM_001004419    | CLEC2D  | C-type lectin domain family 2, member D                                   |
| 2696 | 2926 | 2713 | 2778 | 2316 | 2020 | 2336 | 2224 | 1.25 | 0.012 | NR_000020       | SNORD33 | small nucleolar RNA, C/D box 33                                           |
| 158  | 151  | 143  | 151  | 131  | 107  | 123  | 120  | 1.25 | 0.021 | NM_201649       | SLC6A9  | solute carrier family 6 (neurotransmitter transporter, glycine), member 9 |
| 142  | 138  | 146  | 142  | 117  | 103  | 119  | 113  | 1.25 | 0.007 | NM_002354       | EPCAM   | epithelial cell adhesion molecule                                         |
| 906  | 986  | 855  | 916  | 753  | 710  | 727  | 730  | 1.25 | 0.010 | ENST00000447487 | RPS27   | ribosomal protein S27                                                     |

|      |      |      |      |      |      |      |      |      |       |                 |              |                                                                                                                                                  |
|------|------|------|------|------|------|------|------|------|-------|-----------------|--------------|--------------------------------------------------------------------------------------------------------------------------------------------------|
| 200  | 194  | 187  | 193  | 151  | 148  | 163  | 154  | 1.26 | 0.003 | NM_006408       | AGR2         | anterior gradient homolog 2 ( <i>Xenopus laevis</i> )                                                                                            |
| 171  | 160  | 147  | 159  | 138  | 110  | 132  | 126  | 1.26 | 0.040 | NM_001039140    | C20orf27     | chromosome 20 open reading frame 27                                                                                                              |
| 56   | 66   | 61   | 61   | 48   | 45   | 53   | 49   | 1.26 | 0.032 | NM_001263       | CDS1         | CDP-diacylglycerol synthase (phosphatidate cytidyltransferase) 1                                                                                 |
| 182  | 191  | 199  | 191  | 151  | 161  | 142  | 151  | 1.26 | 0.006 | NM_005320       | HIST1H1D     | histone cluster 1, H1d                                                                                                                           |
| 38   | 40   | 41   | 40   | 33   | 34   | 27   | 31   | 1.27 | 0.029 | NM_004769       | ACCN3        | amiloride-sensitive cation channel 3                                                                                                             |
| 750  | 838  | 770  | 786  | 550  | 658  | 653  | 620  | 1.27 | 0.020 | NR_002183       | FAM10A4      | ST13-like tumor suppressor                                                                                                                       |
| 482  | 526  | 589  | 533  | 446  | 377  | 437  | 420  | 1.27 | 0.041 | NM_003535       | HIST1H3J     | histone cluster 1, H3j                                                                                                                           |
| 42   | 39   | 39   | 40   | 34   | 34   | 26   | 31   | 1.27 | 0.047 | NM_001102651    | ZNF554       | zinc finger protein 554                                                                                                                          |
| 407  | 372  | 433  | 404  | 311  | 295  | 348  | 318  | 1.27 | 0.022 | NM_014331       | SLC7A11      | solute carrier family 7, (cationic amino acid transporter, y+ system) member 11                                                                  |
| 109  | 118  | 110  | 112  | 97   | 80   | 88   | 88   | 1.27 | 0.012 | NM_024042       | METRN        | meteorin, glial cell differentiation regulator                                                                                                   |
| 43   | 49   | 39   | 44   | 36   | 33   | 35   | 34   | 1.27 | 0.041 | NM_003044       | SLC6A12      | solute carrier family 6 (neurotransmitter transporter, betaine/GABA), member 12                                                                  |
| 112  | 124  | 103  | 113  | 82   | 96   | 87   | 89   | 1.28 | 0.030 | XR_038419       | LOC645181    | similar to PDGFA associated protein 1                                                                                                            |
| 88   | 92   | 95   | 92   | 62   | 77   | 76   | 72   | 1.28 | 0.016 | NR_002726       | HNRNPA3P1    | heterogeneous nuclear ribonucleoprotein A3 pseudogene 1                                                                                          |
| 141  | 152  | 142  | 145  | 120  | 105  | 113  | 113  | 1.29 | 0.005 | NM_014256       | B3GNT3       | UDP-GlcNAc:betaGal beta-1,3-N-acetylglucosaminyltransferase 3                                                                                    |
| 48   | 40   | 45   | 44   | 33   | 33   | 36   | 34   | 1.29 | 0.016 | NM_173664       | ARL10        | ADP-ribosylation factor-like 10                                                                                                                  |
| 179  | 194  | 198  | 190  | 151  | 166  | 125  | 147  | 1.29 | 0.032 | NM_032328       | EFCAB2       | EF-hand calcium binding domain 2                                                                                                                 |
| 92   | 105  | 111  | 103  | 76   | 90   | 72   | 79   | 1.30 | 0.038 | NM_001824       | CKM          | creatine kinase, muscle                                                                                                                          |
| 134  | 127  | 118  | 126  | 93   | 97   | 100  | 97   | 1.31 | 0.005 | NM_004650       | PNPLA4       | patatin-like phospholipase domain containing 4                                                                                                   |
| 51   | 50   | 42   | 48   | 36   | 32   | 41   | 36   | 1.32 | 0.039 | NM_015645       | C1QTNF5      | C1q and tumor necrosis factor related protein 5                                                                                                  |
| 252  | 232  | 234  | 239  | 185  | 183  | 176  | 181  | 1.32 | 0.001 | NM_017527       | LY6K         | lymphocyte antigen 6 complex, locus K                                                                                                            |
| 152  | 179  | 153  | 161  | 133  | 131  | 102  | 122  | 1.32 | 0.042 | NM_001037161    | ACOT1        | acyl-CoA thioesterase 1                                                                                                                          |
| 59   | 61   | 59   | 60   | 46   | 49   | 41   | 45   | 1.32 | 0.005 | NM_002447       | MST1R        | macrophage stimulating 1 receptor (c-met-related tyrosine kinase)                                                                                |
| 226  | 245  | 237  | 236  | 170  | 196  | 168  | 178  | 1.33 | 0.005 | NM_012067       | AKR7A3       | aldo-keto reductase family 7, member A3 (aflatoxin aldehyde reductase)                                                                           |
| 486  | 460  | 397  | 448  | 354  | 319  | 340  | 338  | 1.33 | 0.018 | NM_006579       | EBP          | emopamil binding protein (sterol isomerase)                                                                                                      |
| 64   | 72   | 67   | 68   | 49   | 61   | 43   | 51   | 1.33 | 0.047 | NM_175075       | C8orf42      | chromosome 8 open reading frame 42                                                                                                               |
| 48   | 40   | 45   | 44   | 30   | 37   | 34   | 33   | 1.33 | 0.023 | NR_003667       | SUGT1P1      | suppressor of G2 allele of SKP1 pseudogene 1 ( <i>S. cerevisiae</i> )                                                                            |
| 135  | 167  | 167  | 156  | 106  | 126  | 120  | 117  | 1.34 | 0.034 | NM_004202       | TMSB4Y       | thymosin beta 4, Y-linked                                                                                                                        |
| 57   | 59   | 66   | 61   | 43   | 54   | 40   | 45   | 1.34 | 0.034 | NM_031895       | CACNG8       | calcium channel, voltage-dependent, gamma subunit 8                                                                                              |
| 143  | 155  | 169  | 156  | 114  | 122  | 109  | 115  | 1.35 | 0.008 | NM_004878       | PTGES        | prostaglandin E synthase                                                                                                                         |
| 91   | 84   | 93   | 89   | 78   | 53   | 65   | 66   | 1.36 | 0.037 | NM_001080431    | SLC45A4      | solute carrier family 45, member 4                                                                                                               |
| 97   | 85   | 75   | 86   | 65   | 62   | 62   | 63   | 1.36 | 0.023 | NM_017805       | RASIP1       | Ras interacting protein 1                                                                                                                        |
| 96   | 98   | 97   | 97   | 62   | 79   | 71   | 71   | 1.37 | 0.006 | NM_025211       | GKAP1        | G kinase anchoring protein 1                                                                                                                     |
| 50   | 39   | 41   | 44   | 30   | 34   | 30   | 31   | 1.39 | 0.031 | NM_001034173    | ALDH1L2      | aldehyde dehydrogenase 1 family, member L2                                                                                                       |
| 50   | 45   | 43   | 46   | 31   | 33   | 35   | 33   | 1.40 | 0.006 | NM_000499       | CYP1A1       | cytochrome P450, family 1, subfamily A, polypeptide 1                                                                                            |
| 2114 | 2418 | 1898 | 2143 | 1518 | 1509 | 1531 | 1519 | 1.41 | 0.015 | BC037964        | DHX37        | DEAH (Asp-Glu-Ala-His) box polypeptide 37                                                                                                        |
| 384  | 340  | 306  | 343  | 254  | 261  | 214  | 243  | 1.41 | 0.021 | NM_080430       | SELM         | selenoprotein M                                                                                                                                  |
| 58   | 50   | 44   | 51   | 39   | 30   | 38   | 36   | 1.41 | 0.044 | NM_007332       | TRPA1        | transient receptor potential cation channel, subfamily A, member 1                                                                               |
| 84   | 93   | 70   | 82   | 60   | 63   | 50   | 58   | 1.42 | 0.038 | NM_001354       | AKR1C2       | aldo-keto reductase family 1, member C2 (dihydrodiol dehydrogenase 2; bile acid binding protein; 3-alpha hydroxysteroid dehydrogenase, type III) |
| 149  | 161  | 154  | 155  | 117  | 111  | 98   | 109  | 1.42 | 0.002 | XR_040249       | LOC124685    | hCG1644301                                                                                                                                       |
| 46   | 39   | 47   | 44   | 29   | 35   | 27   | 31   | 1.43 | 0.021 | NM_014364       | GAPDHS       | glyceraldehyde-3-phosphate dehydrogenase, spermatogenic                                                                                          |
| 51   | 48   | 52   | 50   | 40   | 33   | 32   | 35   | 1.44 | 0.005 | NM_004098       | EMX2         | empty spiracles homeobox 2                                                                                                                       |
| 65   | 71   | 55   | 63   | 38   | 50   | 43   | 44   | 1.46 | 0.026 | NM_198472       | C10orf125    | chromosome 10 open reading frame 125                                                                                                             |
| 65   | 64   | 48   | 59   | 45   | 41   | 35   | 40   | 1.46 | 0.038 | NM_013376       | SERTAD1      | SERTA domain containing 1                                                                                                                        |
| 59   | 75   | 63   | 66   | 41   | 55   | 39   | 45   | 1.47 | 0.040 | ENST00000309775 | LOC100291851 | similar to Putative ubiquitin-like protein FUBI-like protein ENSP00000310146                                                                     |
| 133  | 133  | 117  | 128  | 89   | 88   | 83   | 87   | 1.47 | 0.002 | NM_080875       | MIB2         | mindbomb homolog 2 ( <i>Drosophila</i> )                                                                                                         |
| 108  | 150  | 120  | 126  | 80   | 96   | 78   | 85   | 1.49 | 0.039 | NM_198849       | SLAH3        | seven in absentia homolog 3 ( <i>Drosophila</i> )                                                                                                |
| 57   | 54   | 48   | 53   | 39   | 37   | 30   | 35   | 1.49 | 0.010 | NM_080390       | TCEAL2       | transcription elongation factor A (SII)-like 2                                                                                                   |
| 534  | 646  | 543  | 574  | 362  | 463  | 281  | 369  | 1.56 | 0.032 | J04755          | FTHL5        | ferritin, heavy polypeptide-like 5                                                                                                               |
| 163  | 166  | 170  | 166  | 90   | 96   | 119  | 101  | 1.64 | 0.002 | NM_002852       | PTX3         | pentraxin 3, long                                                                                                                                |
| 260  | 251  | 216  | 242  | 142  | 119  | 178  | 147  | 1.65 | 0.012 | NM_006528       | TFPI2        | tissue factor pathway inhibitor 2                                                                                                                |

| 63 71 75 70 | 36 46 37 40 | 1.75 0.003 | [NM\\_194249](#) DND1 dead end homolog 1 (zebrafish)
